# Supplementary material
Source: PubMed Central journal article supplement (PMC4325821)
Supplement: AAC.04819-14_zac003153801so1.pdf [file AAC.04819-14_zac003153801so1.pdf]

# 1 Supplementary

- 2 Supplementary Table 1. List of all strains used in this work, all are *E. coli* (unless  
3 indicated *Sty*, meaning *Salmonella enterica* Serovar. Typhimurium).

| Strain  | Genotype                                   | Origin and description                                 |
|---------|--------------------------------------------|--------------------------------------------------------|
| DA5438  | <i>E. coli</i> MG1655                      | Lab collection, Wild type                              |
| DA14704 |                                            | Amd <sup>R</sup> UTI isolate, provided by G. Kahlmeter |
| DA14709 |                                            | Amd <sup>R</sup> UTI isolate, provided by G. Kahlmeter |
| DA14710 |                                            | Amd <sup>R</sup> UTI isolate, provided by G. Kahlmeter |
| DA14712 |                                            | Amd <sup>R</sup> UTI isolate, provided by G. Kahlmeter |
| DA14713 |                                            | Amd <sup>R</sup> UTI isolate, provided by G. Kahlmeter |
| DA14715 |                                            | Amd <sup>R</sup> UTI isolate, provided by G. Kahlmeter |
| DA14718 |                                            | Amd <sup>R</sup> UTI isolate, provided by G. Kahlmeter |
| DA14719 |                                            | Amd <sup>R</sup> UTI isolate, provided by G. Kahlmeter |
| DA18464 | <i>aspS</i> (prom)                         | This work, original Amd <sup>R</sup> isolate           |
| DA18465 | <i>thrS</i> (R609H)                        | This work, original Amd <sup>R</sup> isolate           |
| DA18467 | <i>ubiE</i> (del bp 346-349 → FS)          | This work, original Amd <sup>R</sup> isolate           |
| DA18468 | <i>thrS</i> (S517A), <i>eutG</i> (M65V)    | This work, original Amd <sup>R</sup> isolate           |
| DA18469 | <i>aspS</i> (prom, -10)                    | This work, original Amd <sup>R</sup> isolate           |
| DA18471 | <i>aspS</i> (P170L)                        | This work, original Amd <sup>R</sup> isolate           |
| DA18474 | <i>thrS</i> (K609E)                        | This work, original Amd <sup>R</sup> isolate           |
| DA18476 | <i>aspS</i> (prom, -35), <i>tpx</i> (C95Y) | This work, original Amd <sup>R</sup> isolate           |
| DA18477 | <i>rplL</i> (prom and dupl)                | This work, original Amd <sup>R</sup> isolate           |
| DA18480 | <i>aspS</i> (P191S)                        | This work, original Amd <sup>R</sup> isolate           |
| DA18481 | <i>ppa</i> (D11A)                          | This work, original Amd <sup>R</sup> isolate           |
| DA18482 | <i>rpoB</i> (H447L), <i>araB</i> (I450L)   | This work, original Amd <sup>R</sup> isolate           |
| DA18483 | <i>ubiX</i> (del bp 246 → FS)              | This work, original Amd <sup>R</sup> isolate           |
| DA18484 | <i>aspS</i> (E4G)                          | This work, original Amd <sup>R</sup> isolate           |
| DA18485 | <i>ppa</i> (del after gene)                | This work, original Amd <sup>R</sup> isolate           |
| DA18487 | <i>gltX</i> (S294F)                        | This work, original Amd <sup>R</sup> isolate           |
| DA18488 | <i>thrS</i> (E519G)                        | This work, original Amd <sup>R</sup> isolate           |
| DA18489 | <i>mrdA</i> (D389G), <i>trxB</i> (G37D)    | This work, original Amd <sup>R</sup> isolate           |
| DA18490 | <i>mrdA</i> (D389G)                        | This work, original Amd <sup>R</sup> isolate           |
| DA18491 | <i>ispA</i> ::IS1                          | This work, original Amd <sup>R</sup> isolate           |
| DA18493 | <i>spoT</i> (S305P)                        | This work, original Amd <sup>R</sup> isolate           |
| AD18494 | <i>aspS</i> (E4G)                          | This work, original Amd <sup>R</sup> isolate           |
| DA18496 | <i>ppa</i> (D11A)                          | This work, original Amd <sup>R</sup> isolate           |
| DA18497 | <i>gltX</i> (D180G)                        | This work, original Amd <sup>R</sup> isolate           |
| DA19261 | MG1655 <i>ompR</i> :: <i>cat</i> from pKD3 | Used for amplification of <i>cat</i> cassette          |
| DA24033 | Amd <sup>R</sup> gene unknown              | This work, original Amd <sup>R</sup> isolate           |
| DA24034 | Amd <sup>R</sup> gene unknown              | This work, original Amd <sup>R</sup> isolate           |
| DA24035 | <i>cysB</i> (del bp 148 → FS)              | This work, original Amd <sup>R</sup> isolate           |
| DA24036 | Amd <sup>R</sup> gene unknown              | This work, original Amd <sup>R</sup> isolate           |
| DA24037 | Amd <sup>R</sup> gene unknown              | This work, original Amd <sup>R</sup> isolate           |
| DA24038 | Amd <sup>R</sup> gene unknown              | This work, original Amd <sup>R</sup> isolate           |
| DA24039 | Amd <sup>R</sup> gene unknown              | This work, original Amd <sup>R</sup> isolate           |
| DA24040 | Amd <sup>R</sup> gene unknown              | This work, original Amd <sup>R</sup> isolate           |
| DA24041 | Amd <sup>R</sup> gene unknown              | This work, original Amd <sup>R</sup> isolate           |
| DA24042 | Amd <sup>R</sup> gene unknown              | This work, original Amd <sup>R</sup> isolate           |
| DA24043 | Amd <sup>R</sup> gene unknown              | This work, original Amd <sup>R</sup> isolate           |

|         |                                                     |                                                                                                         |
|---------|-----------------------------------------------------|---------------------------------------------------------------------------------------------------------|
| DA24044 | Amd <sup>R</sup> gene unknown                       | This work, original Amd <sup>R</sup> isolate                                                            |
| DA24045 | Amd <sup>R</sup> gene unknown                       | This work, original Amd <sup>R</sup> isolate                                                            |
| DA24046 | Amd <sup>R</sup> gene unknown                       | This work, original Amd <sup>R</sup> isolate                                                            |
| DA24047 | Amd <sup>R</sup> gene unknown                       | This work, original Amd <sup>R</sup> isolate                                                            |
| DA24048 | Amd <sup>R</sup> gene unknown                       | This work, original Amd <sup>R</sup> isolate                                                            |
| DA24049 | Amd <sup>R</sup> gene unknown                       | This work, original Amd <sup>R</sup> isolate                                                            |
| DA24050 | Amd <sup>R</sup> gene unknown                       | This work, original Amd <sup>R</sup> isolate                                                            |
| DA24051 | Amd <sup>R</sup> gene unknown                       | This work, original Amd <sup>R</sup> isolate                                                            |
| DA24052 | Amd <sup>R</sup> gene unknown                       | This work, original Amd <sup>R</sup> isolate                                                            |
| DA24053 | Amd <sup>R</sup> gene unknown                       | This work, original Amd <sup>R</sup> isolate                                                            |
| DA24054 | Amd <sup>R</sup> gene unknown                       | This work, original Amd <sup>R</sup> isolate                                                            |
| DA24055 | Amd <sup>R</sup> gene unknown                       | This work, original Amd <sup>R</sup> isolate                                                            |
| DA24056 | Amd <sup>R</sup> gene unknown                       | This work, original Amd <sup>R</sup> isolate                                                            |
| DA24057 | Amd <sup>R</sup> gene unknown                       | This work, original Amd <sup>R</sup> isolate                                                            |
| DA24058 | Amd <sup>R</sup> gene unknown                       | This work, original Amd <sup>R</sup> isolate                                                            |
| DA24059 | Amd <sup>R</sup> gene unknown                       | This work, original Amd <sup>R</sup> isolate                                                            |
| DA24060 | Amd <sup>R</sup> gene unknown                       | This work, original Amd <sup>R</sup> isolate                                                            |
| DA24100 | MG1655 /pSIM5-Tet                                   | lambda red system Tet <sup>R</sup> plasmid                                                              |
| DA24678 | Amd <sup>R</sup> clinical isolate                   | Re-isolation of clinical isolate. Smaller colonies of isolate DA14707. (Provided by G. Kahlmeter)       |
| DA24686 | Amd <sup>R</sup> clinical isolate                   | Re-isolation of clinical isolate. Smaller colonies of isolate DA14717. (Provided by G. Kahlmeter)       |
| DA24690 | Amd <sup>R</sup> clinical isolate                   | Re-isolation of clinical isolate. Smaller colonies of isolate DA14721. (Provided by G. Kahlmeter)       |
| DA24692 | Amd <sup>R</sup> clinical isolate                   | Re-isolation of clinical isolate. Smaller colonies of isolate DA14723. (Provided by G. Kahlmeter)       |
| DA24978 | <i>ubiE</i> (del bp 346-349 → FS) /pSIM5-Tet        | This work, Lambda red plasmid transformant (Donor: 24100, Recipient: DA18467)                           |
| DA24979 | <i>thrS</i> (K609E) /pSIM5-Tet                      | This work, Lambda red plasmid transformant (Donor: 24100, Recipient: DA18474)                           |
| DA24980 | <i>rplL</i> (prom and dupl) /pSIM5-Tet              | This work, Lambda red plasmid transformant (Donor: 24100, Recipient: DA18477)                           |
| DA24981 | <i>aspS</i> (P191S) /pSIM5-Tet                      | This work, Lambda red plasmid transformant (Donor: 24100, Recipient: DA18480)                           |
| DA24982 | <i>rpoB</i> (H447L), <i>araB</i> (I450L) /pSIM5-Tet | This work, Lambda red plasmid transformant (Donor: 24100, Recipient: DA18482)                           |
| DA24983 | <i>ubiX</i> (del bp 246 → FS) /pSIM5-Tet            | This work, Lambda red plasmid transformant (Donor: 24100, Recipient: DA18483)                           |
| DA24984 | <i>gltX</i> (S294F) /pSIM5-Tet                      | This work, Lambda red plasmid transformant (Donor: 24100, Recipient: DA18487)                           |
| DA24985 | <i>mrda</i> (D389G) /pSIM5-Tet                      | This work, Lambda red plasmid transformant (Donor: 24100, Recipient: DA18490)                           |
| DA24986 | <i>ispA</i> ::IS1 /pSIM5-Tet                        | This work, Lambda red plasmid transformant (Donor: 24100, Recipient: DA18491)                           |
| DA24987 | <i>spoT</i> (S305P) /pSIM5-Tet                      | This work, Lambda red plasmid transformant (Donor: 24100, Recipient: DA18493)                           |
| DA25197 | <i>E. coli</i> DH5-alpha / pEL3C15-mRFP1            | Plasmid based on the BioBrick vector pSB3T5, containing <i>cat</i> (CamR), mRFP1 and a minimal p15 ori. |
| DA25772 | <i>ppa</i> (D11A) /pSIM5-Tet                        | This work, Lambda red plasmid transformant (Donor: 24100, Recipient: DA18481)                           |
| DA25773 | <i>mrda</i> (D389G), <i>trxB</i> (G37D) /pSIM5-Tet  | This work, Lambda red plasmid transformant (Donor: 24100, Recipient: DA18489)                           |
| DA26124 | <i>thrS</i> (K609E), 1803045::FRT-Cam-FRT           | This work, Linear transformant, Cam cassette inserted                                                   |
| DA26125 | <i>aspS</i> (P191S), 1942263::FRT-Cam-FRT           | This work, Linear transformant, Cam cassette inserted                                                   |
| DA26126 | <i>mrda</i> (D389G), <i>ybeD</i> ::FRT-Cam-FRT      | This work, Linear transformant, Cam cassette inserted                                                   |

|         |                                                                                            |                                                                              |
|---------|--------------------------------------------------------------------------------------------|------------------------------------------------------------------------------|
| DA26127 | <i>ppa</i> (D11A), 4455190::FRT-Cam-FRT                                                    | This work, Linear transformant, Cam cassette inserted                        |
| DA26128 | <i>ubiX</i> (del bp 246 → FS), 2428872::FRT-Cam-FRT                                        | This work, Linear transformant, Cam cassette inserted                        |
| DA26129 | <i>spoT</i> (S305P), 3816783::FRT-Cam-FRT                                                  | This work, Linear transformant, Cam cassette inserted                        |
| DA26130 | <i>rplL</i> (prom and dupl), 4188613::FRT-Cam-FRT                                          | This work, Linear transformant, Cam cassette inserted                        |
| DA26131 | <i>rpoB</i> (H447L), 4188613::FRT-Cam-FRT                                                  | This work, Linear transformant, Cam cassette inserted                        |
| DA26132 | <i>cysB</i> ::FRT-Cam-FRT                                                                  | This work, Linear transformant, Cam cassette inserted                        |
| DA27146 | Sty del(CRISPR1- <i>cas1</i> ):: <i>spc</i> del(CRISPR2):: <i>cat-sacB</i> -T0 / pSIM5-tet | Used for amplification of <i>cat-sacB</i> cassette                           |
| DA27708 | <i>ubiE</i> (del bp 346-349 → FS), 4025329::FRT-Cam-FRT                                    | This work, Linear transformant, Cam cassette inserted                        |
| DA27709 | <i>trxB</i> (G37D), <i>dmsA</i> ::FRT-Cam-FRT                                              | This work, Linear transformant, Cam cassette inserted                        |
| DA28348 | <i>thrS</i> (K609E), 1803045::FRT-Cam-FRT                                                  | This work, Amd <sup>R</sup> transductant (donor: DA26124, recipient: DA5438) |
| DA28349 | 1803045::FRT-Cam-FRT                                                                       | This work, Amd <sup>S</sup> transductant (donor: DA26124, recipient: DA5438) |
| DA28350 | <i>aspS</i> (P191S), 1942263::FRT-Cam-FRT                                                  | This work, Amd <sup>R</sup> transductant (donor: DA26125, recipient: DA5438) |
| DA28351 | 1942263::FRT-Cam-FRT                                                                       | This work, Amd <sup>S</sup> transductant (donor: DA26125, recipient: DA5438) |
| DA28352 | <i>mrda</i> (D389G), <i>ybeD</i> ::FRT-Cam-FRT                                             | This work, Amd <sup>R</sup> transductant (donor: DA26126, recipient: DA5438) |
| DA28353 | <i>ybeD</i> ::FRT-Cam-FRT                                                                  | This work, Amd <sup>S</sup> transductant (donor: DA26126, recipient: DA5438) |
| DA28354 | <i>ppa</i> (D11A), 4455190::FRT-Cam-FRT                                                    | This work, Amd <sup>R</sup> transductant (donor: DA26127, recipient: DA5438) |
| DA28355 | 4455190::FRT-Cam-FRT                                                                       | This work, Amd <sup>S</sup> transductant (donor: DA26127, recipient: DA5438) |
| DA28356 | <i>ubiX</i> (del bp 246 → FS), 2428872::FRT-Cam-FRT                                        | This work, Amd <sup>R</sup> transductant (donor: DA26128, recipient: DA5438) |
| DA28357 | 2428872::FRT-Cam-FRT                                                                       | This work, Amd <sup>S</sup> transductant (donor: DA26128, recipient: DA5438) |
| DA28358 | <i>spoT</i> (S305P), 3816783::FRT-Cam-FRT                                                  | This work, Amd <sup>R</sup> transductant (donor: DA26129, recipient: DA5438) |
| DA28359 | 3816783::FRT-Cam-FRT                                                                       | This work, Amd <sup>S</sup> transductant (donor: DA26129, recipient: DA5438) |
| DA28360 | <i>rplL</i> (prom and dupl), 4188613::FRT-Cam-FRT                                          | This work, Amd <sup>R</sup> transductant (donor: DA26130, recipient: DA5438) |
| DA28361 | 4188613::FRT-Cam-FRT                                                                       | This work, Amd <sup>S</sup> transductant (donor: DA26130, recipient: DA5438) |
| DA28362 | <i>rpoB</i> (H447L), 4188613::FRT-Cam-FRT                                                  | This work, Amd <sup>R</sup> transductant (donor: DA26131, recipient: DA5438) |
| DA28363 | 4188613::FRT-Cam-FRT                                                                       | This work, Amd <sup>S</sup> transductant (donor: DA26131, recipient: DA5438) |
| DA28364 | <i>cysB</i> ::FRT-Cam-FRT                                                                  | This work, knock out, transductant (donor: DA26132, recipient: DA5438)       |
| DA28366 | <i>ubiE</i> (del bp 346-349 → FS), 4025329::FRT-Cam-FRT                                    | This work, Amd <sup>R</sup> transductant (donor: DA27708, recipient: DA5438) |
| DA28367 | 4025329::FRT-Cam-FRT                                                                       | This work, Amd <sup>S</sup> transductant (donor: DA27708, recipient: DA5438) |
| DA28368 | <i>trxB</i> (G37D), <i>dmsA</i> ::FRT-Cam-FRT                                              | This work, Amd <sup>R</sup> transductant (donor: DA27709, recipient: DA5438) |

|         |                                                                                         |                                                                                                 |
|---------|-----------------------------------------------------------------------------------------|-------------------------------------------------------------------------------------------------|
| DA28369 | <i>dmsA::FRT-Cam-FRT</i>                                                                | This work, Amd <sup>S</sup> transductant (donor: DA27709, recipient: DA5438)                    |
| DA28372 | <i>cysB::cat-sacB</i>                                                                   | This work, Linear transformant, cat-sacB cassette inserted (donor: DA27146, recipient: DA24100) |
| DA28432 | <i>ppa</i> (D11A), 4455190::FRT-scar                                                    | This work, reconstructed mutant                                                                 |
| DA28433 | 4455190(scar)                                                                           | This work, reconstructed mutant                                                                 |
| DA28434 | <i>aspS</i> (P191S), 1942263::FRT-scar                                                  | This work, reconstructed mutant                                                                 |
| DA28435 | 1942263(scar)                                                                           | This work, reconstructed control                                                                |
| DA28436 | <i>ubiE</i> (del bp 346-349 → FS), 4025329::FRT-scar                                    | This work, reconstructed mutant                                                                 |
| DA28437 | 4025329(scar)                                                                           | This work, reconstructed control                                                                |
| DA28438 | <i>spoT</i> (S305P), 3816783::FRT-scar                                                  | This work, reconstructed mutant                                                                 |
| DA28439 | <i>cysB</i> (scar)                                                                      | This work, knock out                                                                            |
| DA29703 | <i>thrS</i> (K609E), 1803045::FRT-scar                                                  | This work, reconstructed mutant                                                                 |
| DA29704 | 1803045::FRT scar                                                                       | This work, reconstructed control                                                                |
| DA29705 | <i>mrdA</i> (D389G), <i>ybeD</i> ::FRT-scar                                             | This work, reconstructed mutant                                                                 |
| DA29706 | <i>ybeD</i> ::FRT-scar                                                                  | This work, reconstructed control                                                                |
| DA29707 | <i>ubiX</i> (del bp 246 → FS), 2428872::FRT-scar                                        | This work, reconstructed mutant                                                                 |
| DA29708 | 2428872::FRT-scar                                                                       | This work, reconstructed control                                                                |
| DA29709 | 3816783::FRT-scar                                                                       | This work, reconstructed control                                                                |
| DA29710 | <i>rplL</i> (-10 prom), 4188613::FRT-scar                                               | This work, reconstructed mutant                                                                 |
| DA29711 | 4188613::FRT-scar                                                                       | This work, reconstructed control                                                                |
| DA29712 | <i>rpoB</i> (H447L), 4188613::FRT-scar                                                  | This work, reconstructed mutant                                                                 |
| DA29713 | 4188613::FRT-scar                                                                       | This work, reconstructed control                                                                |
| DA29715 | <i>trxB</i> (G37D), <i>dmsA</i> ::FRT-scar                                              | This work, reconstructed mutant                                                                 |
| DA29716 | <i>dmsA</i> ::FRT-scar                                                                  | This work, reconstructed control                                                                |
| DA29717 | <i>mrdA</i> (D389G), <i>ybeD</i> ::FRT-scar, <i>trxB</i> (G37D), <i>dmsA</i> ::FRT-scar | This work, reconstructed mutant                                                                 |
| DA30113 | <i>gltX</i> (S294F), 2536530::FRT-Cam-FRT                                               | This work, Linear transformant, Cam cassette inserted                                           |
| DA30114 | <i>ispA</i> ::IS1, 430247::FRT-Cam-FRT                                                  | This work, Linear transformant, Cam cassette inserted                                           |
| DA30116 | <i>gltX</i> (S294F), 2536530::FRT-Cam-FRT                                               | This work, Amd <sup>R</sup> transductant (donor:DA30113, recipient: DA5438)                     |
| DA30117 | 2536530::FRT-Cam-FRT                                                                    | This work, Amd <sup>S</sup> transductant (donor: DA30113, recipient: DA5438)                    |
| DA30118 | <i>ispA</i> ::IS1, 430247::FRT-Cam-FRT                                                  | This work, Amd <sup>R</sup> transductant (donor:DA30114, recipient: DA5438)                     |
| DA30119 | 430247::FRT-Cam-FRT                                                                     | This work, Amd <sup>S</sup> transductant (donor: DA30114, recipient: DA5438)                    |
| DA30120 | <i>gltX</i> (S294F), 2536530::FRT-scar                                                  | This work, reconstructed mutant                                                                 |
| DA30121 | 2536530::FRT-scar                                                                       | This work, reconstructed control                                                                |
| DA30122 | <i>ispA</i> ::IS1, 430247::FRT-scar                                                     | This work, reconstructed mutant                                                                 |
| DA30123 | 430247::FRT-scar                                                                        | This work, reconstructed control                                                                |
| DA32973 | Amd <sup>R</sup> clinical isolate                                                       | ECO SENS II nr 1403, from Växjö (Greece)                                                        |
| DA32977 | Amd <sup>R</sup> clinical isolate                                                       | ECO SENS nr 2604, from Växjö (Finland)                                                          |

|         |                                                         |                                                                                                                                                              |
|---------|---------------------------------------------------------|--------------------------------------------------------------------------------------------------------------------------------------------------------------|
| DA32978 | Amd <sup>R</sup> clinical isolate                       | ECO SENS II nr 4005, from Växjö (UK)                                                                                                                         |
| DA32979 | Amd <sup>R</sup> clinical isolate                       | ECO SENS II nr 4289, from Växjö (UK)                                                                                                                         |
| DA34895 | <i>cysB</i> (G241E)                                     | This work, Linear transformation: <i>cysB</i> from clinical strain DA14710 transformed into wildtype over <i>cat-sacB</i> .                                  |
| DA34896 | <i>cysB</i> (Q103stop)                                  | This work, Linear transformation: <i>cysB</i> from clinical strain DA14713 transformed into wildtype over <i>cat-sacB</i> .                                  |
| DA34897 | <i>cysB</i> (1 bp ins. nt 485→FS)                       | This work, linear transformation: <i>cysB</i> from clinical strain DA14718 transformed into wildtype over <i>cat-sacB</i> .                                  |
| DA34898 | <i>cysB</i> (K76stop)                                   | This work, linear transformation: <i>cysB</i> from clinical strain DA24686 transformed into wildtype over <i>cat-sacB</i> .                                  |
| DA35001 | Amd <sup>R</sup> clinical isolate                       | From Gunnar Kahlmeter (DE 118, Germany)                                                                                                                      |
| DA37697 | MG1655 /pEL3c15- <i>cysB</i>                            | This work, transformant. pEL3c15 cleaved with XbaI and PstI and ligated with insert containing the <i>cysB</i> gene including promoter from DA5438. Clone E. |
| DA37700 | <i>cysB</i> (G241E) /pEL3c15- <i>cysB</i>               | This work, transformant. pEL3c15- <i>cysB</i> from DA37697 transformed into clinical strain DA14710, clone A.                                                |
| DA37701 | <i>cysB</i> (G241E) /pEL3c15- <i>cysB</i>               | This work, transformant. pEL3c15- <i>cysB</i> from DA37697 transformed into clinical strain DA14710, clone D.                                                |
| DA37702 | <i>cysB</i> (Q103stop) /pEL3c15- <i>cysB</i>            | This work, transformant. pEL3c15- <i>cysB</i> from DA37697 transformed into clinical strain DA14713, clone A.                                                |
| DA37703 | <i>cysB</i> (Q103stop) /pEL3c15- <i>cysB</i>            | This work, transformant. pEL3c15- <i>cysB</i> from DA37697 transformed into clinical strain DA14713, clone B.                                                |
| DA37704 | <i>cysB</i> (Q103stop) /pEL3c15- <i>cysB</i>            | This work, transformant. pEL3c15- <i>cysB</i> from DA37697 transformed into clinical strain DA14713, clone C.                                                |
| DA37705 | <i>cysB</i> (1 bp ins. nt 485→FS) /pEL3c15- <i>cysB</i> | This work, transformant. pEL3c15- <i>cysB</i> from DA37697 transformed into clinical strain DA14718, clone B.                                                |
| DA37706 | <i>cysB</i> (1 bp ins. nt 485→FS) /pEL3c15- <i>cysB</i> | This work, transformant. pEL3c15- <i>cysB</i> from DA37697 transformed into clinical strain DA14718, clone B.                                                |
| DA37707 | <i>cysB</i> (1 bp del. nt 262→FS) /pEL3c15- <i>cysB</i> | This work, transformant. pEL3c15- <i>cysB</i> from DA37697 transformed into clinical strain DA14719, clone A.                                                |
| DA37708 | <i>cysB</i> (1 bp del. nt 262→FS) /pEL3c15- <i>cysB</i> | This work, transformant. pEL3c15- <i>cysB</i> from DA37697 transformed into clinical strain DA14719, clone B.                                                |
| DA37709 | <i>cysB</i> (1 bp del. nt 262→FS) /pEL3c15- <i>cysB</i> | This work, transformant. pEL3c15- <i>cysB</i> from DA37697 transformed into clinical strain DA14719, clone C.                                                |
| DA37710 | <i>cysB</i> (1 bp del. nt 262→FS) /pEL3c15- <i>cysB</i> | This work, transformant. pEL3c15- <i>cysB</i> from DA37697 transformed into clinical strain DA14719, clone D.                                                |
| DA37711 | <i>cysB</i> (K76stop) /pEL3c15- <i>cysB</i>             | This work, transformant. pEL3c15- <i>cysB</i> from DA37697 transformed into clinical strain DA24686, clone A.                                                |
| DA37712 | <i>cysB</i> (K76stop) /pEL3c15- <i>cysB</i>             | This work, transformant. pEL3c15- <i>cysB</i> from DA37697 transformed into clinical strain DA24686, clone B.                                                |

|         |                                             |                                                                                                                    |
|---------|---------------------------------------------|--------------------------------------------------------------------------------------------------------------------|
| DA37713 | <i>cysB</i> (K76stop) /pEL3c15- <i>cysB</i> | This work, transformant. pEL3c15- <i>cysB</i> from DA37697 transformed into clinical strain DA24686, clone D.      |
| DA37715 | <i>cysB</i> ::scar, /pEL3c15- <i>cysB</i>   | This work, transformant. pEL3c15- <i>cysB</i> from DA37697 transformed into <i>cysB</i> KO strain DA28439, clone C |

FS, frame shift; del, deletion; dupl, duplication; fus, fusion; ins, insertion

4

5 Supplementary Table 2. All PCR primers used in this work.

| Primer name       | Sequence                                                                 | Used for                                                                                                                                      |
|-------------------|--------------------------------------------------------------------------|-----------------------------------------------------------------------------------------------------------------------------------------------|
| aspS_FWD          | CAGCACCCGTTTCGTATC                                                       | amplification of the <i>aspS</i> gene                                                                                                         |
| aspS_REV          | AATTTCCAGTATAATAGCCGCC                                                   | amplification of the <i>aspS</i> gene                                                                                                         |
| aspS_LiTr_FWD     | CTTATCCGACCTACGGTTCGGTA<br>TCTCTGGTAGTCTCGTTGTAGG<br>CTGGAGCTGCTTC       | amplification of the Cam cassette inserted between the <i>znuB</i> and <i>ruvB</i> genes (linked to <i>aspS</i> )                             |
| aspS_LiTr_REV     | ATCCGGCACTGGCAATATGCCTG<br>ATGCGACGCTGTTCCGCGCATATG<br>AATATCCTCCTTAG    | amplification of the Cam cassette inserted between the <i>znuB</i> and <i>ruvB</i> genes (linked to <i>aspS</i> )                             |
| znuB_ruvB_scr_FWD | TGTTTTGGTGGGGATGGTG                                                      | screening of insert between <i>znuB</i> and <i>ruvB</i>                                                                                       |
| znuB_ruvB_scr_REV | AGAACGTGAAACCATTGAGGA                                                    | screening of insert between <i>znuB</i> and <i>ruvB</i>                                                                                       |
| cysB_FWD          | GAAAAAGACGGAAAGGCGA                                                      | amplification of the <i>cysB</i> gene and screening of the <i>cysB</i> KO                                                                     |
| cysB_REV          | GCGAGGCGGGTAATTAGA                                                       | amplification of the <i>cysB</i> gene and screening of the <i>cysB</i> KO                                                                     |
| cysB_KO_FWD       | ATGAAATTACAACAACCTTCGCT<br>ATATTGTTGAGGTGGTCATGTA<br>GGCTGGAGCTGCTTC     | amplification of the <i>cat-sacB</i> cassette used for KO of the <i>cysB</i> gene                                                             |
| cysB_KO_REV       | TTATTTTTCCGGCAGTTTTATAT<br>CTTTAAACATGACCTCACATATG<br>AATATCCTCCTTAGTTCC | amplification of the <i>cat-sacB</i> cassette used for KO of the <i>cysB</i> gene                                                             |
| cysB_plasmid_FWD  | TATATCTAGAAAAGACGGAAAG<br>GCGACTGG                                       | amplification of the <i>cysB</i> gene for insertion on the pEL3c15 plasmid (primer containing restriction enzyme cleavage sites <i>Xba</i> I) |
| cysB_plasmid_REV  | TATACTGCAGGATCGCGGCGGG<br>TTCCTGA                                        | amplification of the <i>cysB</i> gene for insertion on the pEL3c15 plasmid (primer containing restriction enzyme cleavage sites <i>Pst</i> I) |
| gltX_FWD          | CAGGAAAAAGTCGCGCAA                                                       | amplification of the <i>gltX</i> gene                                                                                                         |
| gltX_REV          | GATCGCAAAACAGACCGT                                                       | amplification of the <i>gltX</i> gene                                                                                                         |
| gltX_LiTr_FWD     | ACTGTTAAAAAAGTGCCTTTG<br>TTTATGCCGGATGCGGCGTGTAG<br>GCTGGAGCTGCTTC       | amplification of the Cam cassette inserted between the <i>yfeS</i> and <i>cysM</i> genes (linked to <i>gltX</i> )                             |
| gltX_LiTr_REV     | ATTGAATTAGCACGATTTTGT<br>GGCCGATAAGGCGTTTACATA<br>TGAATATCCTCCTTAG       | amplification of the Cam cassette inserted between the <i>yfeS</i> and <i>cysM</i> genes (linked to <i>gltX</i> )                             |
| yfeS_cysM_FWD     | TTACGGCGTTTCCTCACGA                                                      | screening of insert between <i>yfeS</i> and <i>cysM</i>                                                                                       |
| yfeS_cysM_REV     | GGGCGGGGATTTAAGGAT                                                       | screening of insert between <i>yfeS</i> and <i>cysM</i>                                                                                       |
| ispA_FWD          | TCGTGCGAGATTTCCGGT                                                       | amplification of the <i>ispA</i> gene                                                                                                         |
| ispA_REV          | ATTTGCCCTGAGTCCGTT                                                       | amplification of the <i>ispA</i> gene                                                                                                         |

|                    |                                                                      |                                                                                                                                            |
|--------------------|----------------------------------------------------------------------|--------------------------------------------------------------------------------------------------------------------------------------------|
| ispA_LiTr_FWD      | CGTGCTTTTGTGGCCGGACAAA<br>GCGTTTACGCCGCATCCTGTAGG<br>CTGGAGCTGCTTC   | amplification of the Cam cassette<br>inserted between the <i>yajD</i> and <i>tsx</i><br>genes (linked to <i>ispA</i> )                     |
| ispA_LiTr_REV      | TTCCCGGCATTTCTGATTGTAA<br>CAACGTGTGCTTTGTTCCATATG<br>AATATCCTCCTTAG  | amplification of the Cam cassette<br>inserted between the <i>yajD</i> and <i>tsx</i><br>genes (linked to <i>ispA</i> )                     |
| yajD_tsx_scr_FWD   | GGGGAAGATGCGCAGAAA                                                   | screening of insert between <i>yajD</i><br>and <i>tsx</i>                                                                                  |
| yajD_tsx_scr_REV   | AACTACGATCACTGGCACT                                                  | screening of insert between <i>yajD</i><br>and <i>tsx</i>                                                                                  |
| mrda_FWD           | ATTTTACGCTCCATCATGCC                                                 | amplification of the <i>mrda</i> gene                                                                                                      |
| mrda_REV           | TGTCGCCTGCCTGTAAAG                                                   | amplification of the <i>mrda</i> gene                                                                                                      |
| mrda_LiTr_FWD      | AGTTGCCTTTGCTGCTTGGTTTT<br>ACCGTTGGGGTGTAGTCTGTAG<br>GCTGGAGCTGCTTC  | amplification of the Cam cassette<br>used for KO of the <i>ybeD</i> gene<br>(linked to <i>mrda</i> )                                       |
| mrda_LiTr_REV      | TGATCAGGTGGTTGAAGTGGTA<br>CAGCGCCATGCGCCAGGTCATAT<br>GAATATCCTCCTTAG | amplification of the Cam cassette<br>used for KO of the <i>ybeD</i> gene<br>(linked to <i>mrda</i> )                                       |
| ybeD_scr_FWD       | AGCTGGCGGACAAGAATTTTA                                                | screening of the <i>ybeD</i> gene KO                                                                                                       |
| ybeD_scr_REV       | CGCTGGTTGTGTTGCAAGA                                                  | screening of the <i>ybeD</i> gene KO                                                                                                       |
| ppa_FWD            | GGATGAGGTGGTGGAAAGAGG                                                | amplification of the <i>ppa</i> gene                                                                                                       |
| ppa_REV            | ATGAAAAATGCGGCTACGG                                                  | amplification of the <i>ppa</i> gene                                                                                                       |
| ppa_LiTr_FWD       | TAGCCAGATATAGTATGCGTAG<br>GCCGGATAAGGCGTTCCTGTAG<br>GCTGGAGCTGCTTC   | amplification of the Cam cassette<br>inserted between the <i>mpl</i> and<br><i>ygjD</i> genes (linked to <i>ppa</i> )                      |
| ppa_LiTr_REV       | ACGCATCAAGCGTCGCATCAGGC<br>ACTATGCTCAAATGCCGCATATG<br>AATATCCTCCTTAG | amplification of the Cam cassette<br>inserted between the <i>mpl</i> and<br><i>ygjD</i> genes (linked to <i>ppa</i> )                      |
| mpl_ygjA_FWD       | TGGAGTGGCGATGTGGAT                                                   | screening of insert between <i>mpl</i><br>and <i>ygjA</i>                                                                                  |
| mpl_ygjA_REV       | ACGCGAAGAAAGAGAAAGAAG                                                | screening of insert between <i>mpl</i><br>and <i>ygjA</i>                                                                                  |
| rplL_FWD           | CGACCTACGAAGAAGCAA                                                   | amplification of the <i>rplL</i> gene                                                                                                      |
| rplL_REV           | AGGCACAGCAGTAGTCAAA                                                  | amplification of the <i>rplL</i> gene                                                                                                      |
| rpoBmut_FWD        | AGCGAACATGGAGCTGAG                                                   | amplification of the 500 bp<br>around the <i>rpoB</i> (H447L)<br>mutation in DA18482                                                       |
| rpoBmut_REV        | TCGGACCTTCAGGGGTTT                                                   | amplification of the 500 bp<br>around the <i>rpoB</i> (H447L)<br>mutation in DA18482                                                       |
| rplL_rpoB_LiTr_FWD | CAGGGCGAAACGAGGAAGAAGC<br>TTTTCGCCCTGGACAACATGTAG<br>GCTGGAGCTGCTTC  | amplification of the Cam cassette<br>inserted between the <i>sroH</i> and<br><i>thiH</i> genes (linked to <i>rplL</i> and<br><i>rpoB</i> ) |
| rplL_rpoB_LiTr_REV | TTGAAAGCGTTGTGTTTTTTTA<br>TGGTAGTGCCGTCAGCAGCATAT<br>GAATATCCTCCTTAG | amplification of the Cam cassette<br>inserted between the <i>sroH</i> and<br><i>thiH</i> genes (linked to <i>rplL</i> and<br><i>rpoB</i> ) |
| sroH_thiH_scr_FWD  | TGCCTTGACCTTGCGATAAT                                                 | screening of insert between <i>sroH</i><br>and <i>thiH</i>                                                                                 |
| sroH_thiH_scr_REV  | AACAGTTCTCACCGCACGA                                                  | screening of insert between <i>sroH</i><br>and <i>thiH</i>                                                                                 |
| spoTmut_FWD        | GAAGGGCGTTTGCAGGAAG                                                  | amplification of the 500 bp<br>around the <i>spoT</i> (S305P)<br>mutation in DA18493                                                       |
| spoTmut_REV        | ATAAGCGAAGTCGACGGG                                                   | amplification of the 500 bp<br>around the <i>spoT</i> (S305P)<br>mutation in DA18493                                                       |

|                   |                                                                       |                                                                                                                   |
|-------------------|-----------------------------------------------------------------------|-------------------------------------------------------------------------------------------------------------------|
| spoT_LiTr_FWD     | AATAGCGATTTTCACATAACTAC<br>AAGTTATCAATTTCCCCTGTAG<br>GCTGGAGCTGCTTC   | amplification of the Cam cassette inserted between the <i>dinD</i> and <i>yicG</i> genes (linked to <i>spoT</i> ) |
| spoT_LiTr_REV     | GGTAGCGATTTGTGCGCATTGTC<br>ACGATTGAGATTTTTTACATAT<br>GAATATCCTCCTTAG  | amplification of the Cam cassette inserted between the <i>dinD</i> and <i>yicG</i> genes (linked to <i>spoT</i> ) |
| dinD_yicG_scr_FWD | ACCCGATGCGTAAGCCAA                                                    | screening of insert between <i>dinD</i> and <i>yicG</i>                                                           |
| dinD_yicG_scr_REV | AATATCGCGCACTGACCC                                                    | screening of insert between <i>dinD</i> and <i>yicG</i>                                                           |
| thrS_FWD          | CTCCGGCTTCTTCTGCTT                                                    | amplification of the <i>thrS</i> gene                                                                             |
| thrS_REV          | TAACATCGCTCAACCGGG                                                    | amplification of the <i>thrS</i> gene                                                                             |
| thrS_LiTr_FWD     | ATAATTTTTATTTTTTTCATAAAA<br>ACGCAGAAACAGTGACCATGTA<br>GGCTGGAGCTGCTTC | amplification of the Cam cassette inserted between the <i>arpB</i> and <i>yniD</i> genes (linked to <i>thrS</i> ) |
| thrS_LiTr_REV     | AAGGGATTTTTTGTATTACAG<br>CCGTCGGGTGGCGTTGTGCATAT<br>GAATATCCTCCTTAG   | amplification of the Cam cassette inserted between the <i>arpB</i> and <i>yniD</i> genes (linked to <i>thrS</i> ) |
| arpB_yniD_scr_FWD | TGGCCGCTAAAAATCATGAC                                                  | screening of insert between <i>arpB</i> and <i>yniD</i>                                                           |
| arpB_yniD_scr_REV | TCTGGCTGTCTTCGTTTGT                                                   | screening of insert between <i>arpB</i> and <i>yniD</i>                                                           |
| trxB_FWD          | AAGCCCAGCAGACGAGAA                                                    | amplification of the <i>trxB</i> gene                                                                             |
| trxB_REV          | AGAGGTGATAATGACGGGAGAA                                                | amplification of the <i>trxB</i> gene                                                                             |
| trxB_LiTr_FWD     | ATGAAAACGAAAATCCCTGATG<br>CGGTATTGGCTGCTGAGGTGTA<br>GGCTGGAGCTGCTTC   | amplification of the Cam cassette used for KO of the <i>dmsA</i> gene (linked to <i>trxB</i> )                    |
| trxB_LiTr_REV     | TACACCTTTTCAACCTGAACAAG<br>GTTTGTATGTGACGGATCATAT<br>GAATATCCTCCTTAG  | amplification of the Cam cassette used for KO of the <i>dmsA</i> gene (linked to <i>trxB</i> )                    |
| dmsA_scr_FWD      | CGCTTTTTTGTCTCCCTTTGA                                                 | screening of the <i>dmsA</i> gene KO                                                                              |
| dmsA_scr_REV      | CCGTTATCTTCCCTGCCAGT                                                  | screening of the <i>dmsA</i> gene KO                                                                              |
| ubiE_FWD          | CGGCAGGCAATGAAAAAAC                                                   | amplification of the <i>ubiE</i> gene                                                                             |
| ubiE_REV          | TACCTCCACGCGCAATAC                                                    | amplification of the <i>ubiE</i> gene                                                                             |
| ubiE_LiTr_FWD     | GTATCTGGCAAACCATGCCCGAT<br>GCGACGCTGTCGCGTCTTGTAGG<br>CTGGAGCTGCTTC   | amplification of the Cam cassette inserted between the <i>fre</i> and <i>fadA</i> genes (linked to <i>ubiE</i> )  |
| ubiE_LiTr_REV     | TAAACGCCTTATCCGGCCTACGG<br>TTCGGACTATTTGTAGGCATAT<br>GAATATCCTCCTTAG  | amplification of the Cam cassette inserted between the <i>fre</i> and <i>fadA</i> genes (linked to <i>ubiE</i> )  |
| fre_fadA_scr_FWD  | TTGCCCGGATCTGTTTT                                                     | screening of insert between <i>fre</i> and <i>fadA</i>                                                            |
| fre_fadA_scr_REV  | ATGTGTATCGGTCTGGGT                                                    | screening of insert between <i>fre</i> and <i>fadA</i>                                                            |
| ubiX_FWD          | TGTGTTGTGTGTTTGCAGG                                                   | amplification of the <i>ubiX</i> gene                                                                             |
| ubiX_REV          | AAAGCAGTGCAACGTCAG                                                    | amplification of the <i>ubiX</i> gene                                                                             |
| ubiX_LiTr_FWD     | CGCGCATCAATAAAAATGGCGCT<br>GAAAAAATATTCAACGCTGTAG<br>GCTGGAGCTGCTTC   | amplification of the Cam cassette inserted between the <i>cvpA</i> and <i>dedD</i> genes (linked to <i>ubiX</i> ) |
| ubiX_LiTr_REV     | CATCCGACACGATTGCCCGATG<br>CCGCAAAGGCATAAAAACATAT<br>GAATATCCTCCTTAG   | amplification of the Cam cassette inserted between the <i>cvpA</i> and <i>dedD</i> genes (linked to <i>ubiX</i> ) |
| cvpA_dedD_scr_FWD | AAAAAGCAATCACCGCGA                                                    | screening of insert between <i>cvpA</i> and <i>dedD</i>                                                           |
| cvpA_dedD_scr_REV | GGCTTAAGTGGCGTGGTA                                                    | screening of insert between <i>cvpA</i> and <i>dedD</i>                                                           |



8 Supplementary Table 3. Population analysis (comparing the same genes from  
 9 several strains of the same species to *E. coli* MG1655) accession numbers for the  
 10 clinical amindinocillin resistant strains are KP670466-KP670849 in GenBank.

| <b>Sequence name (gene and strain)</b> | <b>Accession number</b> |
|----------------------------------------|-------------------------|
| alaS_DA14704                           | KP670466                |
| alaS_DA14709                           | KP670467                |
| alaS_DA14710                           | KP670468                |
| alaS_DA14712                           | KP670469                |
| alaS_DA14713                           | KP670470                |
| alaS_DA14715                           | KP670471                |
| alaS_DA14718                           | KP670472                |
| alaS_DA14719                           | KP670473                |
| alaS_DA24678                           | KP670474                |
| alaS_DA24686                           | KP670475                |
| alaS_DA24690                           | KP670476                |
| alaS_DA24692                           | KP670477                |
| argS_DA14704                           | KP670478                |
| argS_DA14709                           | KP670479                |
| argS_DA14710                           | KP670480                |
| argS_DA14712                           | KP670481                |
| argS_DA14713                           | KP670482                |
| argS_DA14715                           | KP670483                |
| argS_DA14718                           | KP670484                |
| argS_DA14719                           | KP670485                |
| argS_DA24678                           | KP670486                |
| argS_DA24686                           | KP670487                |
| argS_DA24690                           | KP670488                |
| argS_DA24692                           | KP670489                |
| aroK_DA14704                           | KP670490                |
| aroK_DA14709                           | KP670491                |
| aroK_DA14710                           | KP670492                |
| aroK_DA14712                           | KP670493                |
| aroK_DA14713                           | KP670494                |
| aroK_DA14715                           | KP670495                |
| aroK_DA14718                           | KP670496                |
| aroK_DA14719                           | KP670497                |
| aroK_DA24678                           | KP670498                |
| aroK_DA24686                           | KP670499                |
| aroK_DA24690                           | KP670500                |
| aroK_DA24692                           | KP670501                |
| aspS_DA14704                           | KP670502                |
| aspS_DA14709                           | KP670503                |
| aspS_DA14710                           | KP670504                |
| aspS_DA14712                           | KP670505                |
| aspS_DA14713                           | KP670506                |
| aspS_DA14715                           | KP670507                |
| aspS_DA14718                           | KP670508                |
| aspS_DA14719                           | KP670509                |
| aspS_DA24678                           | KP670510                |
| aspS_DA24686                           | KP670511                |

|              |          |
|--------------|----------|
| aspS_DA24690 | KP670512 |
| aspS_DA24692 | KP670513 |
| crp_DA14704  | KP670514 |
| crp_DA14709  | KP670515 |
| crp_DA14710  | KP670516 |
| crp_DA14712  | KP670517 |
| crp_DA14713  | KP670518 |
| crp_DA14715  | KP670519 |
| crp_DA14718  | KP670520 |
| crp_DA14719  | KP670521 |
| crp_DA24678  | KP670522 |
| crp_DA24686  | KP670523 |
| crp_DA24690  | KP670524 |
| crp_DA24692  | KP670525 |
| cyaA_DA14704 | KP670526 |
| cyaA_DA14709 | KP670527 |
| cyaA_DA14710 | KP670528 |
| cyaA_DA14712 | KP670529 |
| cyaA_DA14713 | KP670530 |
| cyaA_DA14715 | KP670531 |
| cyaA_DA14718 | KP670532 |
| cyaA_DA14719 | KP670533 |
| cyaA_DA24678 | KP670534 |
| cyaA_DA24686 | KP670535 |
| cyaA_DA24690 | KP670536 |
| cyaA_DA24692 | KP670537 |
| cysB_DA14704 | KP670538 |
| cysB_DA14709 | KP670539 |
| cysB_DA14710 | KP670540 |
| cysB_DA14712 | KP670541 |
| cysB_DA14713 | KP670542 |
| cysB_DA14715 | KP670543 |
| cysB_DA14718 | KP670544 |
| cysB_DA14719 | KP670545 |
| cysB_DA24678 | KP670546 |
| cysB_DA24686 | KP670547 |
| cysB_DA24690 | KP670548 |
| cysB_DA24692 | KP670549 |
| rpL_DA14704  | KP670550 |
| rpL_DA14709  | KP670551 |
| rpL_DA14710  | KP670552 |
| rpL_DA14712  | KP670553 |
| rpL_DA14713  | KP670554 |
| rpL_DA14715  | KP670555 |
| rpL_DA14718  | KP670556 |
| rpL_DA14719  | KP670557 |
| rpL_DA24678  | KP670558 |
| rpL_DA24686  | KP670559 |
| rpL_DA24690  | KP670560 |
| rpL_DA24692  | KP670561 |
| cysE_DA14704 | KP670562 |
| cysE_DA14709 | KP670563 |
| cysE_DA14710 | KP670564 |

|              |          |
|--------------|----------|
| cysE_DA14712 | KP670565 |
| cysE_DA14713 | KP670566 |
| cysE_DA14715 | KP670567 |
| cysE_DA14718 | KP670568 |
| cysE_DA14719 | KP670569 |
| cysE_DA24678 | KP670570 |
| cysE_DA24686 | KP670571 |
| cysE_DA24690 | KP670572 |
| cysE_DA24692 | KP670573 |
| ftsA_DA14704 | KP670574 |
| ftsA_DA14709 | KP670575 |
| ftsA_DA14710 | KP670576 |
| ftsA_DA14712 | KP670577 |
| ftsA_DA14713 | KP670578 |
| ftsA_DA14715 | KP670579 |
| ftsA_DA14718 | KP670580 |
| ftsA_DA14719 | KP670581 |
| ftsA_DA24678 | KP670582 |
| ftsA_DA24686 | KP670583 |
| ftsA_DA24690 | KP670584 |
| ftsA_DA24692 | KP670585 |
| ftsQ_DA14704 | KP670586 |
| ftsQ_DA14709 | KP670587 |
| ftsQ_DA14710 | KP670588 |
| ftsQ_DA14712 | KP670589 |
| ftsQ_DA14713 | KP670590 |
| ftsQ_DA14715 | KP670591 |
| ftsQ_DA14718 | KP670592 |
| ftsQ_DA14719 | KP670593 |
| ftsQ_DA24678 | KP670594 |
| ftsQ_DA24686 | KP670595 |
| ftsQ_DA24690 | KP670596 |
| ftsQ_DA24692 | KP670597 |
| ftsZ_DA14704 | KP670598 |
| ftsZ_DA14709 | KP670599 |
| ftsZ_DA14710 | KP670600 |
| ftsZ_DA14712 | KP670601 |
| ftsZ_DA14713 | KP670602 |
| ftsZ_DA14715 | KP670603 |
| ftsZ_DA14718 | KP670604 |
| ftsZ_DA14719 | KP670605 |
| ftsZ_DA24678 | KP670606 |
| ftsZ_DA24686 | KP670607 |
| ftsZ_DA24690 | KP670608 |
| ftsZ_DA24692 | KP670609 |
| galE_DA14704 | KP670610 |
| galE_DA14709 | KP670611 |
| galE_DA14710 | KP670612 |
| galE_DA14712 | KP670613 |
| galE_DA14713 | KP670614 |
| galE_DA14715 | KP670615 |
| galE_DA14718 | KP670616 |
| galE_DA14719 | KP670617 |

|              |          |
|--------------|----------|
| galE_DA24678 | KP670618 |
| galE_DA24686 | KP670619 |
| galE_DA24690 | KP670620 |
| galE_DA24692 | KP670621 |
| gltX_DA14704 | KP670622 |
| gltX_DA14709 | KP670623 |
| gltX_DA14710 | KP670624 |
| gltX_DA14712 | KP670625 |
| gltX_DA14713 | KP670626 |
| gltX_DA14715 | KP670627 |
| gltX_DA14718 | KP670628 |
| gltX_DA14719 | KP670629 |
| gltX_DA24678 | KP670630 |
| gltX_DA24686 | KP670631 |
| gltX_DA24690 | KP670632 |
| gltX_DA24692 | KP670633 |
| ispA_DA14704 | KP670634 |
| ispA_DA14709 | KP670635 |
| ispA_DA14710 | KP670636 |
| ispA_DA14712 | KP670637 |
| ispA_DA14713 | KP670638 |
| ispA_DA14715 | KP670639 |
| ispA_DA14718 | KP670640 |
| ispA_DA14719 | KP670641 |
| ispA_DA24678 | KP670642 |
| ispA_DA24686 | KP670643 |
| ispA_DA24690 | KP670644 |
| ispA_DA24692 | KP670645 |
| lon_DA14704  | KP670646 |
| lon_DA14709  | KP670647 |
| lon_DA14710  | KP670648 |
| lon_DA14712  | KP670649 |
| lon_DA14713  | KP670650 |
| lon_DA14715  | KP670651 |
| lon_DA14718  | KP670652 |
| lon_DA14719  | KP670653 |
| lon_DA24678  | KP670654 |
| lon_DA24686  | KP670655 |
| lon_DA24690  | KP670656 |
| lon_DA24692  | KP670657 |
| mrda_DA14704 | KP670658 |
| mrda_DA14709 | KP670659 |
| mrda_DA14710 | KP670660 |
| mrda_DA14712 | KP670661 |
| mrda_DA14713 | KP670662 |
| mrda_DA14715 | KP670663 |
| mrda_DA14718 | KP670664 |
| mrda_DA14719 | KP670665 |
| mrda_DA24678 | KP670666 |
| mrda_DA24686 | KP670667 |
| mrda_DA24690 | KP670668 |
| mrda_DA24692 | KP670669 |
| mrdb_DA14704 | KP670670 |

|              |          |
|--------------|----------|
| mrdb_DA14709 | KP670671 |
| mrdb_DA14710 | KP670672 |
| mrdb_DA14712 | KP670673 |
| mrdb_DA14713 | KP670674 |
| mrdb_DA14715 | KP670675 |
| mrdb_DA14718 | KP670676 |
| mrdb_DA14719 | KP670677 |
| mrdb_DA24678 | KP670678 |
| mrdb_DA24686 | KP670679 |
| mrdb_DA24690 | KP670680 |
| mrdb_DA24692 | KP670681 |
| mreb_DA14704 | KP670682 |
| mreb_DA14709 | KP670683 |
| mreb_DA14710 | KP670684 |
| mreb_DA14712 | KP670685 |
| mreb_DA14713 | KP670686 |
| mreb_DA14715 | KP670687 |
| mreb_DA14718 | KP670688 |
| mreb_DA14719 | KP670689 |
| mreb_DA24678 | KP670690 |
| mreb_DA24686 | KP670691 |
| mreb_DA24690 | KP670692 |
| mreb_DA24692 | KP670693 |
| mrec_DA14704 | KP670694 |
| mrec_DA14709 | KP670695 |
| mrec_DA14710 | KP670696 |
| mrec_DA14712 | KP670697 |
| mrec_DA14713 | KP670698 |
| mrec_DA14715 | KP670699 |
| mrec_DA14718 | KP670700 |
| mrec_DA14719 | KP670701 |
| mrec_DA24678 | KP670702 |
| mrec_DA24686 | KP670703 |
| mrec_DA24690 | KP670704 |
| mrec_DA24692 | KP670705 |
| mred_DA14704 | KP670706 |
| mred_DA14709 | KP670707 |
| mred_DA14710 | KP670708 |
| mred_DA14712 | KP670709 |
| mred_DA14713 | KP670710 |
| mred_DA14715 | KP670711 |
| mred_DA14718 | KP670712 |
| mred_DA14719 | KP670713 |
| mred_DA24678 | KP670714 |
| mred_DA24686 | KP670715 |
| mred_DA24690 | KP670716 |
| mred_DA24692 | KP670717 |
| ppa_DA14704  | KP670718 |
| ppa_DA14709  | KP670719 |
| ppa_DA14710  | KP670720 |
| ppa_DA14712  | KP670721 |
| ppa_DA14713  | KP670722 |
| ppa_DA14715  | KP670723 |

|              |          |
|--------------|----------|
| ppa_DA14718  | KP670724 |
| ppa_DA14719  | KP670725 |
| ppa_DA24678  | KP670726 |
| ppa_DA24686  | KP670727 |
| ppa_DA24690  | KP670728 |
| ppa_DA24692  | KP670729 |
| rscB_DA14704 | KP670730 |
| rscB_DA14709 | KP670731 |
| rscB_DA14710 | KP670732 |
| rscB_DA14712 | KP670733 |
| rscB_DA14713 | KP670734 |
| rscB_DA14715 | KP670735 |
| rscB_DA14718 | KP670736 |
| rscB_DA14719 | KP670737 |
| rscB_DA24678 | KP670738 |
| rscB_DA24686 | KP670739 |
| rscB_DA24690 | KP670740 |
| rscB_DA24692 | KP670741 |
| rscC_DA14704 | KP670742 |
| rscC_DA14709 | KP670743 |
| rscC_DA14710 | KP670744 |
| rscC_DA14712 | KP670745 |
| rscC_DA14713 | KP670746 |
| rscC_DA14715 | KP670747 |
| rscC_DA14718 | KP670748 |
| rscC_DA14719 | KP670749 |
| rscC_DA24678 | KP670750 |
| rscC_DA24686 | KP670751 |
| rscC_DA24690 | KP670752 |
| rscC_DA24692 | KP670753 |
| rscD_DA14704 | KP670754 |
| rscD_DA14709 | KP670755 |
| rscD_DA14710 | KP670756 |
| rscD_DA14712 | KP670757 |
| rscD_DA14713 | KP670758 |
| rscD_DA14715 | KP670759 |
| rscD_DA14718 | KP670760 |
| rscD_DA14719 | KP670761 |
| rscD_DA24678 | KP670762 |
| rscD_DA24686 | KP670763 |
| rscD_DA24690 | KP670764 |
| rscD_DA24692 | KP670765 |
| rscF_DA14704 | KP670766 |
| rscF_DA14709 | KP670767 |
| rscF_DA14710 | KP670768 |
| rscF_DA14712 | KP670769 |
| rscF_DA14713 | KP670770 |
| rscF_DA14715 | KP670771 |
| rscF_DA14718 | KP670772 |
| rscF_DA14719 | KP670773 |
| rscF_DA24678 | KP670774 |
| rscF_DA24686 | KP670775 |
| rscF_DA24690 | KP670776 |

|              |          |
|--------------|----------|
| rscF_DA24692 | KP670777 |
| rpoB_DA14704 | KP670778 |
| rpoB_DA14709 | KP670779 |
| rpoB_DA14710 | KP670780 |
| rpoB_DA14712 | KP670781 |
| rpoB_DA14713 | KP670782 |
| rpoB_DA14715 | KP670783 |
| rpoB_DA14718 | KP670784 |
| rpoB_DA14719 | KP670785 |
| rpoB_DA24678 | KP670786 |
| rpoB_DA24686 | KP670787 |
| rpoB_DA24690 | KP670788 |
| rpoB_DA24692 | KP670789 |
| slt_DA14704  | KP670790 |
| slt_DA14709  | KP670791 |
| slt_DA14710  | KP670792 |
| slt_DA14712  | KP670793 |
| slt_DA14713  | KP670794 |
| slt_DA14715  | KP670795 |
| slt_DA14718  | KP670796 |
| slt_DA14719  | KP670797 |
| slt_DA24678  | KP670798 |
| slt_DA24686  | KP670799 |
| slt_DA24690  | KP670800 |
| slt_DA24692  | KP670801 |
| spoT_DA14704 | KP670802 |
| spoT_DA14709 | KP670803 |
| spoT_DA14710 | KP670804 |
| spoT_DA14712 | KP670805 |
| spoT_DA14713 | KP670806 |
| spoT_DA14715 | KP670807 |
| spoT_DA14718 | KP670808 |
| spoT_DA14719 | KP670809 |
| spoT_DA24678 | KP670810 |
| spoT_DA24686 | KP670811 |
| spoT_DA24690 | KP670812 |
| spoT_DA24692 | KP670813 |
| thrS_DA14704 | KP670814 |
| thrS_DA14709 | KP670815 |
| thrS_DA14710 | KP670816 |
| thrS_DA14712 | KP670817 |
| thrS_DA14713 | KP670818 |
| thrS_DA14715 | KP670819 |
| thrS_DA14718 | KP670820 |
| thrS_DA14719 | KP670821 |
| thrS_DA24678 | KP670822 |
| thrS_DA24686 | KP670823 |
| thrS_DA24690 | KP670824 |
| thrS_DA24692 | KP670825 |
| ubiE_DA14704 | KP670826 |
| ubiE_DA14709 | KP670827 |
| ubiE_DA14710 | KP670828 |
| ubiE_DA14712 | KP670829 |

|              |          |
|--------------|----------|
| ubiE_DA14713 | KP670830 |
| ubiE_DA14715 | KP670831 |
| ubiE_DA14718 | KP670832 |
| ubiE_DA14719 | KP670833 |
| ubiE_DA24678 | KP670834 |
| ubiE_DA24686 | KP670835 |
| ubiE_DA24690 | KP670836 |
| ubiE_DA24692 | KP670837 |
| ubiX_DA14704 | KP670838 |
| ubiX_DA14709 | KP670839 |
| ubiX_DA14710 | KP670840 |
| ubiX_DA14712 | KP670841 |
| ubiX_DA14713 | KP670842 |
| ubiX_DA14715 | KP670843 |
| ubiX_DA14718 | KP670844 |
| ubiX_DA14719 | KP670845 |
| ubiX_DA24678 | KP670846 |
| ubiX_DA24686 | KP670847 |
| ubiX_DA24690 | KP670848 |
| ubiX_DA24692 | KP670849 |

---

11

12
